# Supplementary material for: Development of potency, breadth and resilience to viral escape mutations in SARS-CoV-2 neutralizing antibodies
Source: PubMed Central journal article supplement — bioRxiv. 2021 Mar 8:2021.03.07.434227. Preprint. [Version 1] doi: 10.1101/2021.03.07.434227 (PMC7987023; doi:10.1101/2021.03.07.434227), 2021-03-08
Supplement: NIHPP2021.03.07.434227-supplement-1.pdf [file NIHPP2021.03.07.434227-supplement-1.pdf]

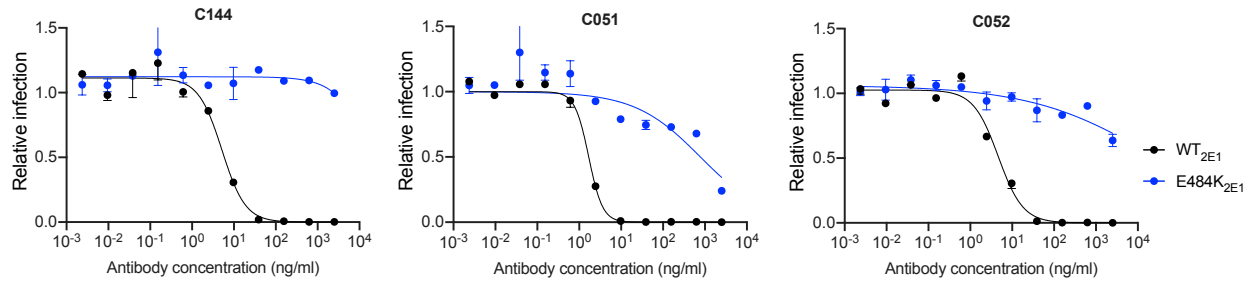

**Figure S1. Effect of E484K substitution on C144/C051/C052 lineage neutralizing potency, related to Figure 1.**

Neutralization of rVSV/SARS-CoV-2 2E1 or a plaque purified E484K mutant thereof, in 293T/ACE2cl.22 cells. Infected (%GFP+) cells relative to no antibody controls, mean and range of two independent experiments is plotted.

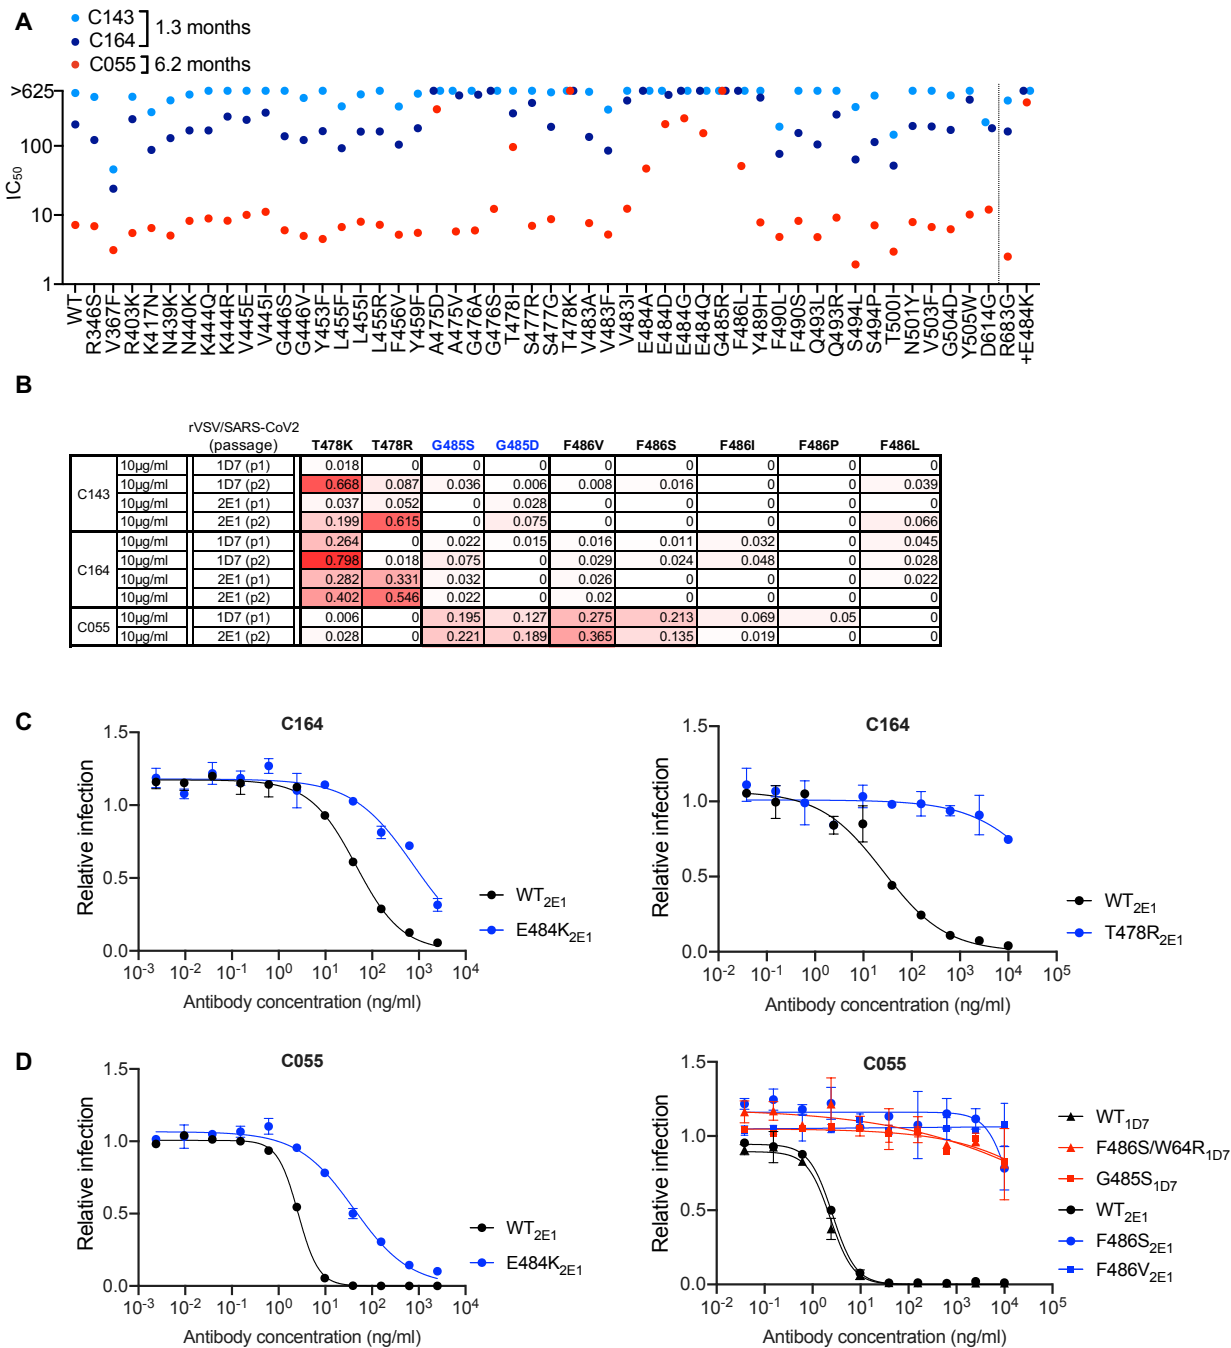

**Figure S2. Effects of somatic mutation on potency and viral escape in the C143/C164/C055 class 2 antibody lineage, related to Figure 1.**

(A) Neutralization potency ( $IC_{50}$ ) of C143, C164 and C055 measured using HIV-1-based SARS-CoV-2 variant pseudotypes and HT1080/ACE2cl.14 cells. The E484K substitution was constructed in an R683G (furin cleavage site mutant) background to increase infectivity. Mean of two independent experiments.

(B) Decimal fraction (color gradient; white = 0, red = 1) of Illumina sequence reads encoding the indicated RBD substitutions following rVSV/SARS-CoV-2 replication (1D7 and 2E1 virus

isolates) in the presence of the indicated amounts of antibodies for the indicated number of passages.

(C) C164 neutralization of rVSV/SARS-CoV-2 1D7, 2E1 or plaque purified mutants thereof, isolated following antibody selection, in 293T/ACE2cl.22 cells. Infected (%GFP+) cells relative to no antibody controls, mean and range of two independent experiments is plotted.

(D) As in C for antibody C055.

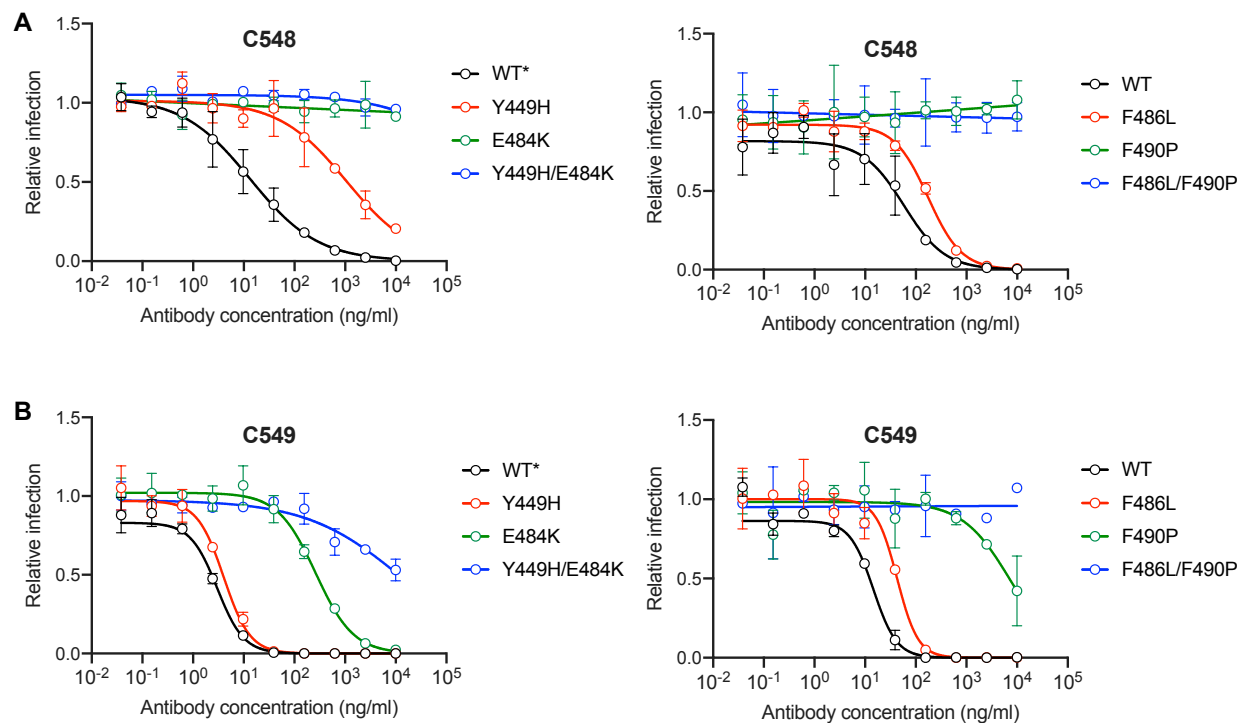

**Figure S3. Effect of viral substitutions on neutralization by C548 and C549, related to Figure 1**

(A) C548 neutralization of HIV-1-based SARS-CoV-2 pseudotypes harboring the indicated substitutions that were identified by selection experiments. Infection (NanoLuc luciferase activity) is normalized to that obtained in the absence of antibody, mean and range of two independent experiments is plotted.

(B) As in A for antibody C549.

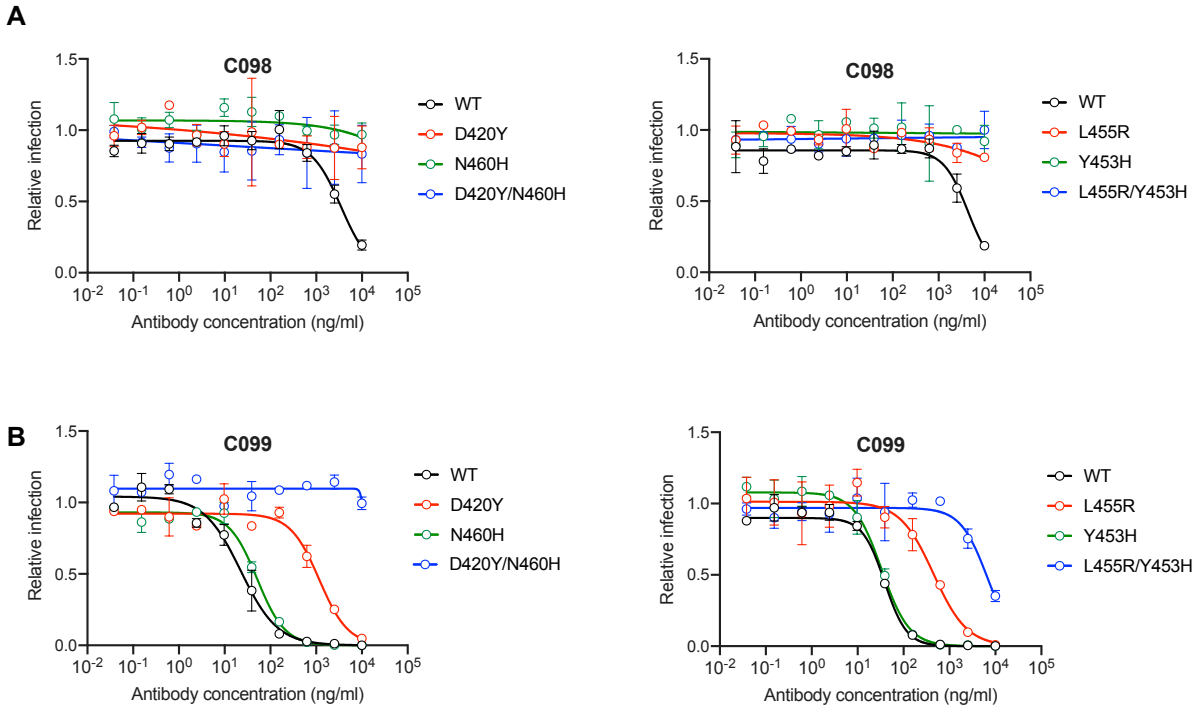

**Figure S4. Effect of viral substitutions on neutralization by C098 and C099, related to Figure 2**

(A) C098 neutralization of HIV-1-based SARS-CoV-2 pseudotypes harboring the indicated substitutions that were identified by selection experiments. Infection (NanoLuc luciferase activity) is normalized to that obtained in the absence of antibody, mean and range of two independent experiments is plotted.

(B) As in A for antibody C099.

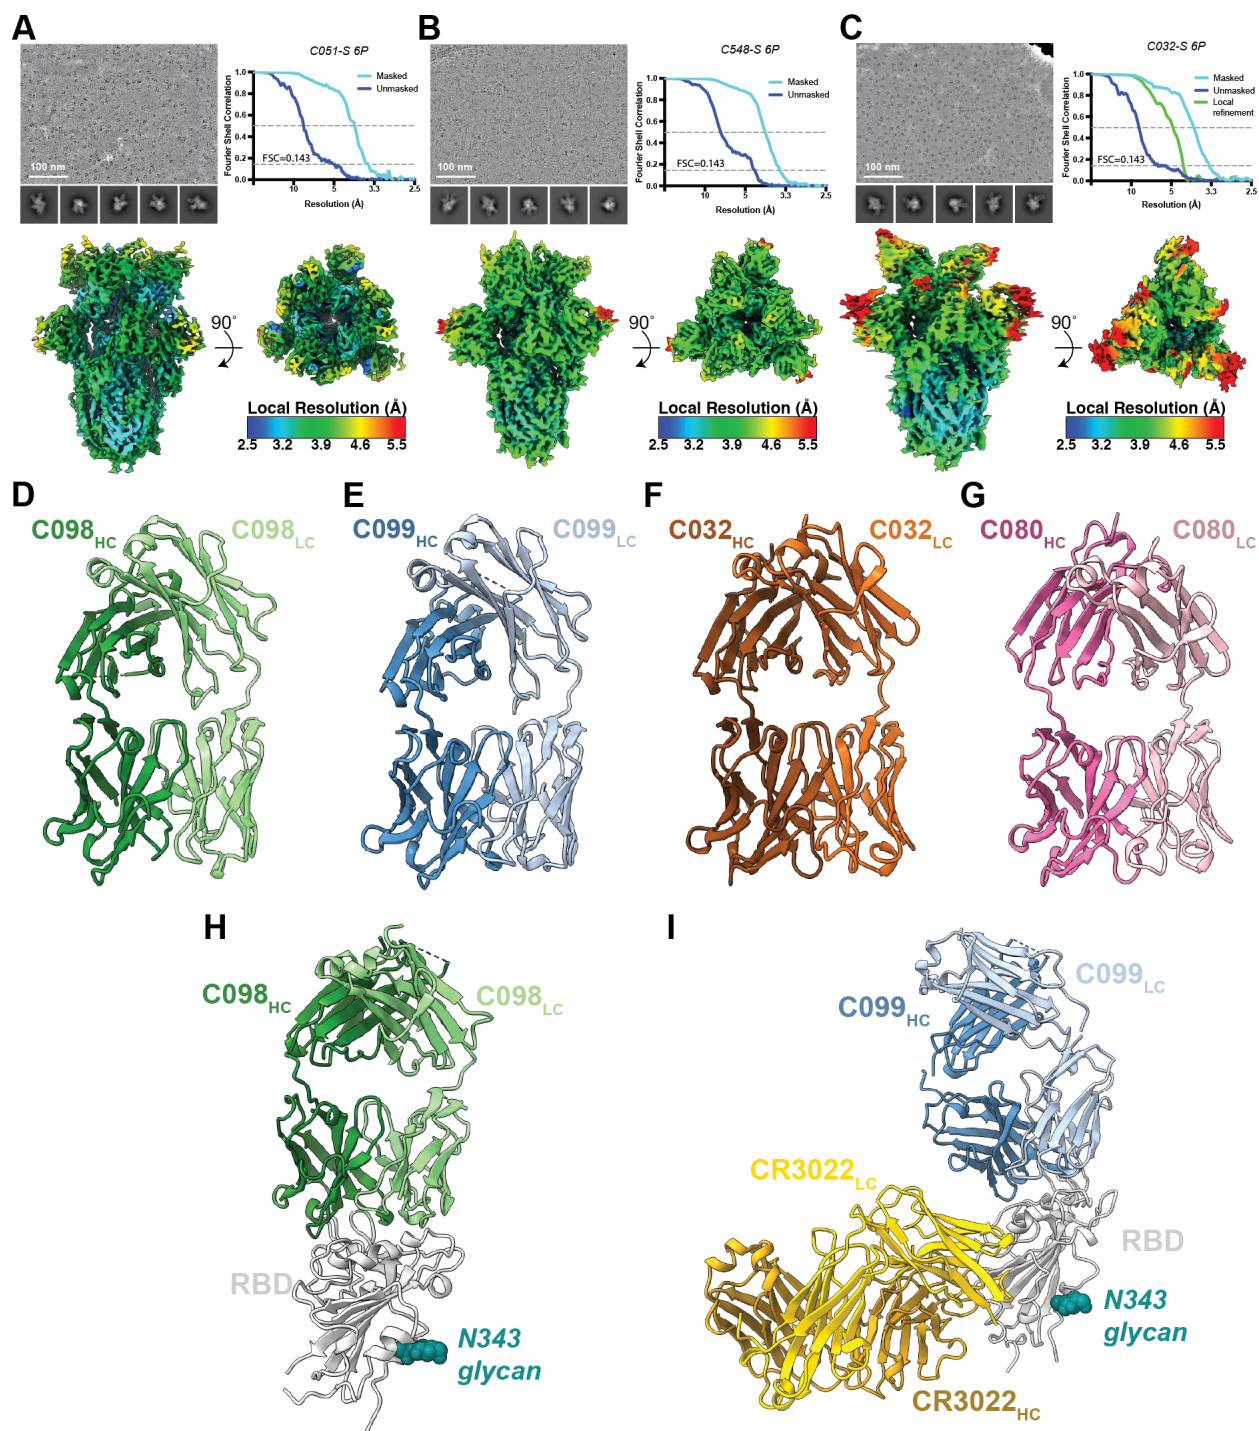

**Figure S5 Cryo-EM data processing and X-ray structures, related to Figures 6,7**  
 (A-C) Representative micrograph, 2D class averages, FSC plots calculated using the gold-standard FSC criteria, and local resolution maps rendered in cryoSparr v2.15 for the cryo-EM structures of (A) C051-S, (B) C032-S, and (C) C548-S complexes.

(D-G) Cartoon representations of crystal structures of (D) C098, (E) C099, (F) C032, and (G) C080 Fabs.

(H) Cartoon representation of C098 Fab – SARS-CoV-2 RBD crystal structure.

(I) Cartoon representation of C099-CR3022 – SARS-CoV-2 RBD crystal structure.



**A**

| <u>C098/C099 Heavy Chain</u>                                              |                                                                                                 | CDRH1 | CDRH2 | CDRH3 |
|---------------------------------------------------------------------------|-------------------------------------------------------------------------------------------------|-------|-------|-------|
| IGHV3-53                                                                  | EVQLVESGGGLIQPGGSLRLSCAASGFTVSSNYMSWVRQAPGKLEWVSVIYSGGSIYYADSVKGRFTISRDNKNTLYLQMNSLRAEDTAVYYCAR |       |       |       |
| C098                                                                      | .....                                                                                           | ..... | ..... | ..... |
| C099                                                                      | .....                                                                                           | ..... | ..... | ..... |
| <u>C098/C099 Light Chain</u> <th>CDRL1</th> <th>CDRL2</th> <th>CDRL3</th> |                                                                                                 | CDRL1 | CDRL2 | CDRL3 |
| IGLV2-20                                                                  | EIVLTQSPGTLSLSPGERATLSCRASQVSSSYLAWYQQKPGQAPRLLIYGASSRATGIPDRFSGSGSGTDFTLTISRLEPEDFAVYYCQQYGSS  |       |       |       |
| C098                                                                      | .....                                                                                           | ..... | ..... | ..... |
| C099                                                                      | .....                                                                                           | ..... | ..... | ..... |

**B**

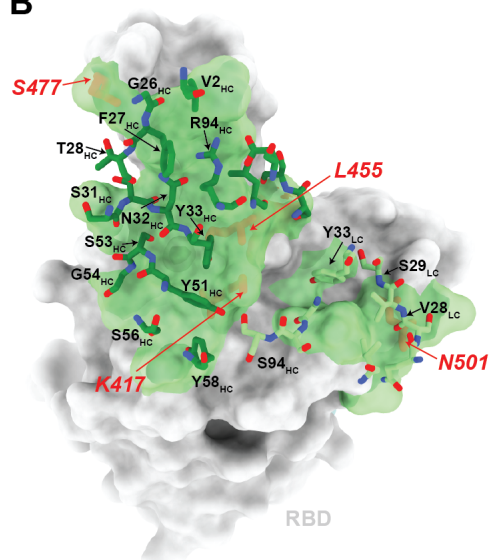

**C**

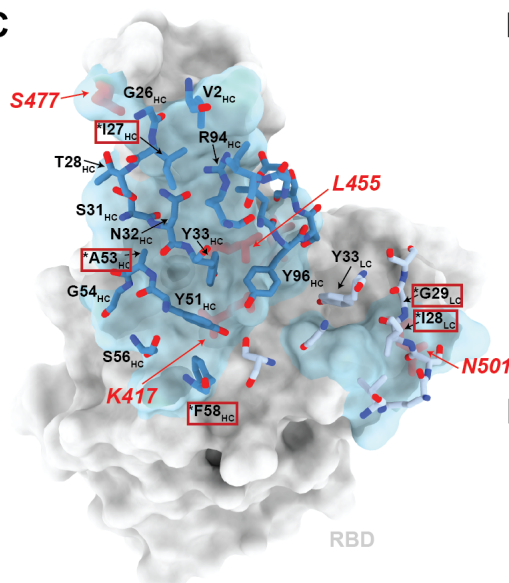

**D**

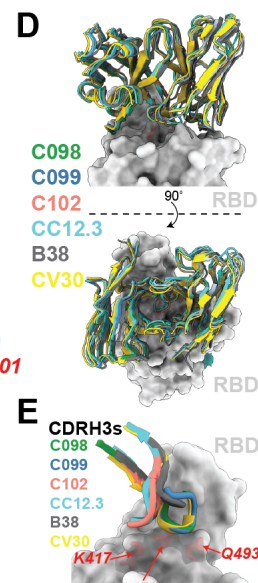

**E**

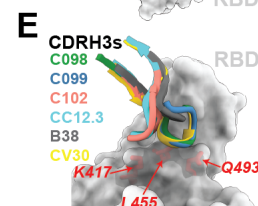

**F**

| <u>C144/C051 Heavy Chain</u> |                                                                                                  | CDRH1 | CDRH2 | CDRH3 |
|------------------------------|--------------------------------------------------------------------------------------------------|-------|-------|-------|
| IGHV3-53                     | EVQLVESGGGLIQPGGSLRLSCAASGFTVSSNYMSWVRQAPGKLEWVSVIYSGGSIYYADSVKGRFTISRDNKNTLYLQMNSLRAEDTAVYYCAR  |       |       |       |
| C144                         | .....                                                                                            | ..... | ..... | ..... |
| C051                         | .....                                                                                            | ..... | ..... | ..... |
| <u>C144/C051 Light Chain</u> |                                                                                                  | CDRL1 | CDRL2 | CDRL3 |
| IGLV2-14                     | QSALTQPASVSGSPGQSIIFISCTGTSDDVGGYNYVSWYQQHPGKAPKLMIVDSNRPSGVNRFSGSKSGNTASLTISGLQAEDEADYICSSYTSST |       |       |       |
| C144                         | .....                                                                                            | ..... | ..... | ..... |
| C051                         | .....                                                                                            | ..... | ..... | ..... |

**G**

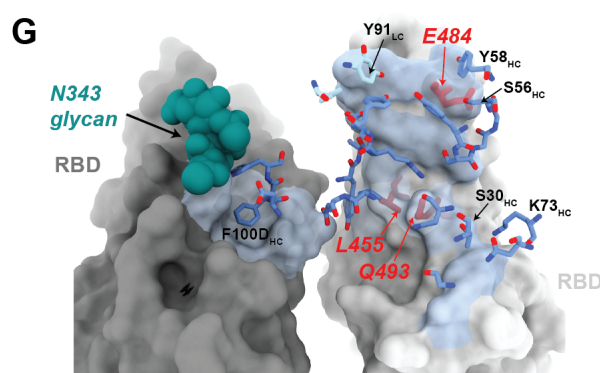

**H**

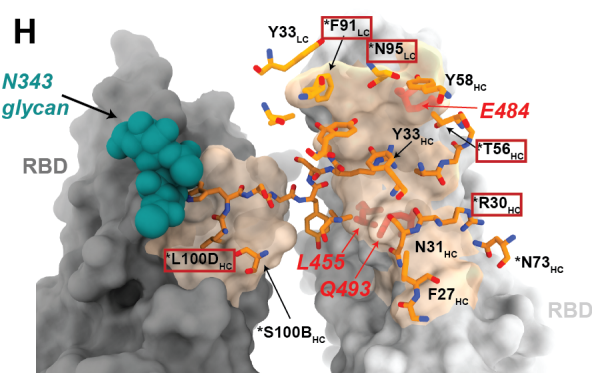

**Figure S6. Class 1 and 2 antibody sequence alignments and interactions with RBD, related to Figure 6.**

(A) Sequence alignment between heavy and light chains of C098 and C099 relative to inferred germline sequences. Paratope residues highlighted in red.

(B) C098 epitope (light green surface on RBD with paratope sidechains from C098 highlighted as sticks).

- (C) C099 epitope (light cyan surface on RBD with paratope sidechains from C099 highlighted as sticks). Somatic hypermutations found in C099 are highlighted with a red box.
- (D) Overlay of V<sub>H</sub>-V<sub>L</sub> domains of class 1 Fabs bound to RBD (C098, green – this study; C099, blue – this study; C102, salmon – PDB 7K8M; CC12.3, cyan – PDB 6XC4; B38, gray – PDB 7BZ5; CV30, yellow – PDB 6XE1).
- (E) Overlay of CDRH3 loops of class 1 Fabs described in panel D at the RBD interface.
- (F) Sequence alignment between heavy and light chains of C144 and C051 relative to inferred germline sequences. Paratope residues highlighted in red.
- (G) C144 epitope (light blue surface on RBD with paratope sidechains from C144 highlighted as sticks).
- (H) C051 epitope (light orange surface on RBD with paratope sidechains from C051 highlighted as sticks).

## A

**C548/C549 Heavy Chain**

|          |                                                                                               |                                         |                                                                                         |
|----------|-----------------------------------------------------------------------------------------------|-----------------------------------------|-----------------------------------------------------------------------------------------|
|          | CDRH1                                                                                         | CDRH2                                   | CDRH3                                                                                   |
| IGHV1-69 | QVQLVQSGAEVKKPGSSVKVCKASGGTFSYAIISWVRQAPGQGLEWMGGIIPFGTANYAQKFKGRVTITADESTSTAYMELSSLRSEDYVYCA |                                         |                                                                                         |
| C548     | .....                                                                                         | .....                                   | .....RREA <del>Y</del> GERDY <del>Y</del> Y <del>Y</del> Y <del>Y</del> GMDVWGQGTIVTVSS |
| C549     | .....TS.....                                                                                  | .....F...P.....I...T.....G...F...S..... | .....P.....FF.....P.....                                                                |

**C548/C549 Light Chain**

|          |                                                                                                       |                                         |                          |
|----------|-------------------------------------------------------------------------------------------------------|-----------------------------------------|--------------------------|
|          | CDRL1                                                                                                 | CDRL2                                   | CDRL3                    |
| IGLV9-49 | QVLTLPQPPSASASLGASVLTICTLSSGYSNYKVDWYQQRPGKPRFVMRVTGGIVGSKGDGIPDRFVSLGSLNRYLTIKNIQEEDSDYHCGADHGSGSNFV |                                         |                          |
| C548     | .SA.....                                                                                              | .....                                   | .....Q...W...GVFGGGTKLTV |
| C549     | .SA.....F.....D...Y.....                                                                              | .....I...P.....F.....S...N...G...E...GT |                          |

**C032/C080 Heavy Chain**

|          |                                                                                                   |                     |                                         |
|----------|---------------------------------------------------------------------------------------------------|---------------------|-----------------------------------------|
|          | CDRH1                                                                                             | CDRH2               | CDRH3                                   |
| IGHV5-51 | EVQLVQSGAEVKKPGESLKISCKGSGYSFTSYWIGWVRQMPGKLEWGMIIYPGDSITRYSPSPFQGVITISADKSISTAYLQWSSLKASDTAMYCAR |                     |                                         |
| C032     | .....                                                                                             | .....               | .....GVAVD <del>W</del> YFDLWGRGLTVTVSS |
| C080     | .....N...A.....I...A...L.....                                                                     | .....R.....S.V..... |                                         |

**C032/C080 Light Chain**

|          |                                                                                                       |             |                        |
|----------|-------------------------------------------------------------------------------------------------------|-------------|------------------------|
|          | CDRL1                                                                                                 | CDRL2       | CDRL3                  |
| IGLV1-40 | QSVLTLPQPPSVSGAPGQRVITISCTGSSSNIGAGYDVHWYQQLPGTAPKLLIYGNRNRPSPGVPDRFSGSKSGTSASLAITGLQAEDEADYQCYSYSSLS |             |                        |
| C032     | .....                                                                                                 | .....       | .....A...LYVFGTGTQVTVL |
| C080     | .....A.....F...Y.....                                                                                 | .....N..... | .....SG.V...D.....     |

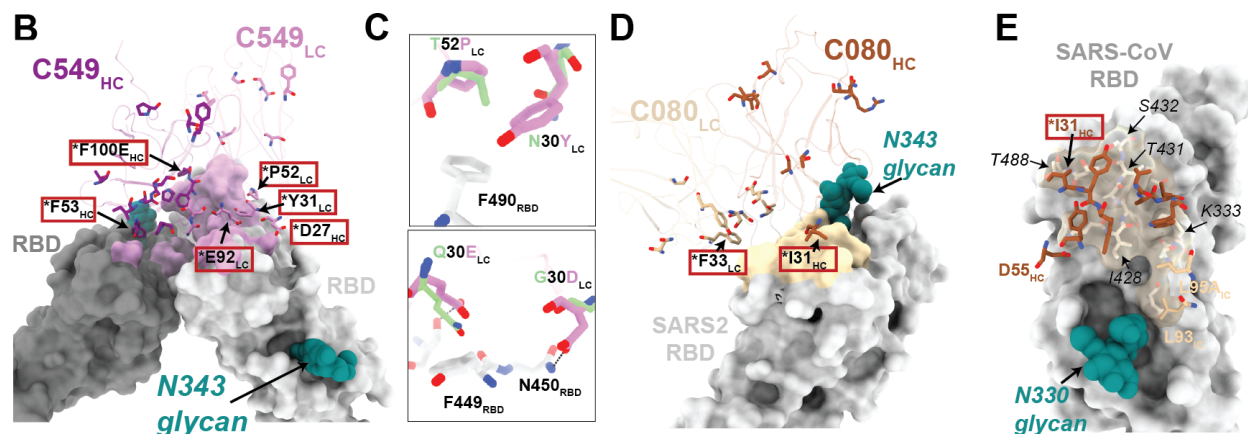

**Figure S7. Class 2 and 3 antibody sequence alignments and homology models, related to Figure 7.**

(A) Sequence alignment between heavy and light chains of C548/C549 and C032/C080 antibody pairs relative to inferred germline sequences. Paratope residues highlighted in red.

(B) Homology model of C549-RBD complex. Antibody somatic mutations are shown as sticks. Residues changed by somatic hypermutation at the predicted RBD interface are indicated by an asterisk and enclosed in a red box.

(C) Predicted interactions between RBD (light gray) and C549 homology model LC residues (violet). C548 residues (light green) are shown.

(D) Homology model of the C080-RBD complex. Antibody somatic mutations are shown as sticks. Residues changed by somatic hypermutation at the predicted RBD interface are indicated by an asterisk and enclosed in a red box.

(E) Homology model of the C080-SARS-CoV RBD complex. Predicted RBD epitope and Fab paratope are shown as colored surface and sticks, respectively. Residues changed by somatic hypermutation at the predicted RBD interface are indicated by an asterisk and enclosed in a red box. Sequence differences in SARS-RBD relative to SARS-CoV-2 RBD are indicated with italics.



**Table S1 Clonally related antibody lineages in this study**

| mAb ID            | Heavy       |             |          |                               | Light       |          |                      |
|-------------------|-------------|-------------|----------|-------------------------------|-------------|----------|----------------------|
|                   | IGHV        | IGHD        | IGHJ     | CDR3                          | IGLV        | IGLJ     | CDRL3                |
| <b>Germline</b>   | IGHV3-53*01 | IGHD3-3*01  | IGHJ4*02 | <b>AR-----YDFWSG-----YFDY</b> | IGLV2-14*01 | IGLJ1*01 | <b>SSYTSST-V</b>     |
| C144 (1.3 months) | IGHV3-53*01 | IGHD3-3*01  | IGHJ4*02 | ..EGEVEG.N....YSRDR.....      | IGLV2-14*01 | IGLJ1*01 | .....R.              |
| C051 (6.2 months) | IGHV3-53*01 | IGHD3-3*01  | IGHJ4*02 | ..EGDVEG.H.S....YSRDR.....    | IGLV2-14*01 | IGLJ1*01 | ....NNN.R.           |
| C052 (6.2 months) | IGHV3-53*01 | IGHD3-3*01  | IGHJ4*02 | ..EGDVEG.....YSRDR.....       | IGLV2-14*01 | IGLJ1*01 | N....NN.R.           |
| C053 (6.2 months) | IGHV3-53*01 | IGHD3-3*01  | IGHJ4*02 | ..EGDVEG.....YSRDR.....       | IGLV2-14*01 | IGLJ1*01 | .....AR.             |
| C054 (6.2 months) | IGHV3-53*01 | IGHD3-3*01  | IGHJ4*02 | ..EGDVEGFS.L....YSRDR.....    | IGLV2-14*01 | IGLJ1*01 | ..F...N.R.           |
| <b>Germline</b>   | IGHV1-69*01 | IGHD3-10*01 | IGHJ6*02 | ----AYG---YYYYGMDV            | IGLV9-49*01 | IGLJ3*02 | <b>GADHGSGSNFV-V</b> |
| C548 (1.3 months) | IGHV1-69*01 | IGHD3-10*01 | IGHJ6*02 | ARRE...PRD.....               | IGLV9-49*01 | IGLJ3*02 | ...Q.....G.          |
| C549 (6.2 months) | IGHV1-69*01 | IGHD3-10*01 | IGHJ6*02 | ARREP..PRD...FF....           | IGLV9-49*01 | IGLJ3*02 | ...E...GT..G.        |
| <b>Germline</b>   | IGHV5-51*01 | IGHD6-19*01 | IGHJ2*01 | <b>AR--AVDWYFDL</b>           | IGLV1-40*01 | IGLJ1*01 | <b>QSYDSSL--YV</b>   |
| C032 (1.3 months) | IGHV5-51*01 | IGHD6-19*01 | IGHJ2*01 | ..GV.....                     | IGLV1-40*01 | IGLJ1*01 | .....AL..            |
| C080 (6.2 months) | IGHV5-51*01 | IGHD6-19*01 | IGHJ2*01 | ..GV.....                     | IGLV1-40*01 | IGLJ1*01 | ..SG.V..DL..         |
| <b>Germline</b>   | IGHV3-53*01 | IGHD6-19*01 | IGHJ3*02 | <b>AR--YSSG--DI</b>           | IGKV3-20*01 | IGKJ1*01 | <b>QQYGSST-T</b>     |
| C098 (1.3 months) | IGHV3-53*01 | IGHD6-19*01 | IGHJ3*02 | ..DL....GT..                  | IGKV3-20*01 | IGKJ1*01 | .....G.              |
| C099 (6.2 months) | IGHV3-53*01 | IGHD6-19*01 | IGHJ3*02 | ..DL....GT..                  | IGKV3-20*01 | IGKJ1*01 | .....G.              |
| <b>Germline</b>   | IGHV3-66*01 | IGHD4-23*01 | IGHJ3*02 | <b>AR-----VAFDI</b>           | IGLV2-23*03 | IGLJ3*02 | <b>CSYAGSSTFV</b>    |
| C143 (1.3 months) | IGHV3-66*01 | IGHD4-23*01 | IGHJ3*02 | ..DSSEVRDHPGHPGRSVG....       | IGLV2-23*03 | IGLJ3*02 | .....A....           |
| C164 (1.3 months) | IGHV3-66*01 | IGHD4-23*01 | IGHJ3*02 | ..DSSEVRDHPGHPGRSVG....       | IGLV2-23*02 | IGLJ3*02 | .....A....           |
| C055 (6.2 months) | IGHV3-66*01 | IGHD4-23*01 | IGHJ3*02 | ..DSSEVRDHPGHPGRSVG....       | IGLV2-23*01 | IGLJ3*02 | .....H....           |
| <b>Germline</b>   | IGHV4-4*02  | IGHD5-18*01 | IGHJ4*02 | <b>AR--DTAM---YFDY</b>        | IGLV2-14*01 | IGLJ3*02 | <b>SSYTSSTL-</b>     |
| C132 (1.3 months) | IGHV4-4*02  | IGHD5-18*01 | IGHJ4*02 | ..GG....GPE....               | IGLV2-14*01 | IGLJ3*02 | .....L               |
| C512 (6.2 months) | IGHV4-4*02  | IGHD5-18*01 | IGHJ4*02 | ..KGG.R..GPE...S              | IGLV2-14*01 | IGLJ3*02 | ..FA.....L           |

**Table S2. X-ray data collection and refinement statistics.**

| PDB ID                                   | C098 Fab           | C099 Fab                         | C032 Fab             | C080 Fab                                      | C098 Fab           | C099 Fab                                      |
|------------------------------------------|--------------------|----------------------------------|----------------------|-----------------------------------------------|--------------------|-----------------------------------------------|
|                                          | SARS-CoV-2 RBD     | CR3022 Fab<br>SARS-CoV-2 RBD     |                      |                                               |                    |                                               |
| <b>Data collection<sup>a,b</sup></b>     |                    |                                  |                      |                                               |                    |                                               |
| Space group                              | C2                 | P4 <sub>1</sub> 2 <sub>1</sub> 2 | C2                   | P2 <sub>1</sub> 2 <sub>1</sub> 2 <sub>1</sub> | P6 <sub>3</sub> 22 | P2 <sub>1</sub> 2 <sub>1</sub> 2 <sub>1</sub> |
| Cell Dimensions                          |                    |                                  |                      |                                               |                    |                                               |
| <i>a, b, c</i> (Å)                       | 191.3, 87.8, 56.8  | 110, 110, 228.6                  | 133.9, 61.7, 69.2    | 58.6, 67.4, 130.6                             | 88.1, 88.1, 216.2  | 44.1, 92.6, 115.2                             |
| $\alpha, \beta, \gamma$ (°)              | 90, 99.8, 90       | 90, 90, 90                       | 90, 97.3, 90         | 90, 90, 90                                    | 90, 90, 120        | 90, 90, 90                                    |
| Resolution (Å)                           | 40.7-2.0 (2.1-2.0) | 39.6-2.6 (2.7-2.6)               | 36.0-2.1 (2.13-2.06) | 36.6-1.9 (2.0-1.9)                            | 43.2-1.4 (1.5-1.4) | 43.0-1.3 (1.31-1.26)                          |
| R <sub>merge</sub> (%)                   | 9.7 (79.4)         | 25.2 (405)                       | 7.7 (95.0)           | 16.73 (175.9)                                 | 7.9 (185.9)        | 9.6 (152.4)                                   |
| R <sub>pim</sub> (%)                     | 6.5 (53.6)         | 7.4 (121.9)                      | 5.2 (66.0)           | 8.1 (85.9)                                    | 2.0 (46.2)         | 4.3 (70.4)                                    |
| CC <sub>1/2</sub> (%)                    | 99.5 (57.7)        | 99.5 (35.1)                      | 99.2 (52.1)          | 99.2 (39.9)                                   | 99.9 (67.2)        | 99.7 (48.5)                                   |
| <I/σI>                                   | 6.8 (1.3)          | 8.9 (1.1)                        | 5.9 (1.1)            | 7.9 (2.0)                                     | 17.4 (1.8)         | 8.3 (1.0)                                     |
| Completeness (%)                         | 95.7 (97.0)        | 100 (100)                        | 94.3 (95.5)          | 98.8 (97.4)                                   | 99.4 (99.1)        | 90.5 (97.7)                                   |
| Redundancy                               | 3.0 (3.0)          | 12.9 (12.6)                      | 2.9 (2.8)            | 5.2 (5.2)                                     | 16.5 (16.8)        | 5.6 (5.5)                                     |
| Wilson <i>B</i> -factor                  | 30.4               | 58.6                             | 40.9                 | 24.2                                          | 18.9               | 13.2                                          |
| <b>Refinement and Validation</b>         |                    |                                  |                      |                                               |                    |                                               |
| Resolution (Å)                           | 40.7-2.0 (2.1-2.0) | 39.6-2.6 (2.66-2.6)              | 36.0-2.1 (2.13-2.06) | 36.6-1.9 (2.0-1.9)                            | 43.2-1.4 (1.5-1.4) | 43.0-1.3 (1.31-1.26)                          |
| Unique Reflections                       | 57,268 (5,762)     | 43,864 (2,600)                   | 32,875 (3,295)       | 41,224 (4,044)                                | 92,932 (9,042)     | 115,943 (12,409)                              |
| Number of atoms                          |                    |                                  |                      |                                               |                    |                                               |
| Protein                                  | 4750               | 8,109                            | 3244                 | 3266                                          | 3352               | 3266                                          |
| Ligand                                   | 14                 | 14                               | -                    | -                                             | -                  | -                                             |
| Waters                                   | 480                | 94                               | 132                  | 371                                           | 336                | 625                                           |
| R <sub>work</sub> /R <sub>free</sub> (%) | 17.9/20.8          | 18.9/23.7                        | 20.0/22.7            | 18.6/22.3                                     | 18.6/20.5          | 18.0/20.1                                     |
| R.m.s. deviations                        |                    |                                  |                      |                                               |                    |                                               |
| Bond lengths (Å)                         | 0.009              | 0.009                            | 0.008                | 0.012                                         | 0.01               | 0.011                                         |
| Bond angles (°)                          | 1.1                | 1.1                              | 1.1                  | 1.1                                           | 1.2                | 1.2                                           |
| Poor rotamers (%)                        | 0                  | 0.82                             | 0                    | 0.55                                          | 1.0                | 1.10                                          |
| Ramachandran plot                        |                    |                                  |                      |                                               |                    |                                               |
| Favored (%)                              | 97.4               | 95.9                             | 96.5                 | 97.9                                          | 98.6               | 98.1                                          |
| Allowed (%)                              | 2.1                | 3.8                              | 3.5                  | 2.1                                           | 1.4                | 1.7                                           |
| Disallowed (%)                           | 0.5                | 0.3                              | 0                    | 0                                             | 0                  | 0.2                                           |
| Average <i>B</i> -factor (Å)             | 40.6               | 59.7                             | 55.4                 | 31.2                                          | 31.0               | 19.9                                          |

<sup>a</sup>For each structure reported, data were derived from a single crystal.

<sup>b</sup>Numbers in parentheses correspond to the highest resolution shell

**Table S3. cryo-EM data collection and refinement statistics.**

|                                                 | <b>C032</b>           | <b>C051</b>            | <b>C548</b>            |
|-------------------------------------------------|-----------------------|------------------------|------------------------|
|                                                 | <b>SARS-CoV-2 S6P</b> | <b>SARS-CoV-2 S 6P</b> | <b>SARS-CoV-2 S 6P</b> |
| <b>PDB</b>                                      |                       |                        |                        |
| <b>EMD</b>                                      |                       |                        |                        |
| <b>Data collection conditions</b>               |                       |                        |                        |
| Microscope                                      | Talos Arctica         | Talos Arctica          | Talos Arctica          |
| Camera                                          | Gatan K3 Summit       | Gatan K3 Summit        | Gatan K3 Summit        |
| Magnification                                   | 45,000x               | 45,000x                | 45,000x                |
| Voltage (kV)                                    | 200                   | 200                    | 200                    |
| Recording mode                                  | counting              | counting               | counting               |
| Dose rate (e <sup>-</sup> /pixel/s)             | 13.5                  | 13.5                   | 13.5                   |
| Electron dose (e <sup>-</sup> /Å <sup>2</sup> ) | 60                    | 60                     | 60                     |
| Defocus range (μm)                              | 0.7 – 2.0             | 0.7 – 2.0              | 0.7 – 2.0              |
| Pixel size (Å)                                  | 0.8689                | 0.8689                 | 0.8689                 |
| Micrographs collected                           | 3,480                 | 3,402                  | 1959                   |
| Micrographs used                                | 2,683                 | 2,927                  | 1687                   |
| Total extracted particles                       | 844,544               | 390,630                | 554,852                |
| Refined particles                               | 192,286               | 134,506                | 94,255                 |
| Symmetry imposed                                | C1                    | C3                     | C3                     |
| Nominal Map Resolution (Å)                      |                       |                        |                        |
| FSC 0.143 (unmasked/masked)                     | 5.4/3.4               | 4.9/3.5                | 4.5/3.5                |
| FSC 0.143 local (unmasked/masked)               | 6.7/4.4               | 5.8/4.1                | N/A                    |
| <b>Refinement and Validation</b>                |                       |                        |                        |
| Initial model used                              | 6XKL                  | 7K90                   | 7K43                   |
| Number of atoms                                 |                       |                        |                        |
| Protein                                         | 25,866                | 28,401                 | 28136                  |
| Ligand                                          | 56                    | 462                    | 574                    |
| MapCC (global/local)                            | 0.70/0.69             | 0.80/0.77              | 0.77/0.76              |
| Map sharpening B-factor                         | 69.3                  | 64.5                   | 110.1                  |
| R.m.s. deviations                               |                       |                        |                        |
| Bond lengths (Å)                                | 0.004                 | 0.008                  | 0.003                  |
| Bond angles (°)                                 | 0.64                  | 1.1                    | 0.52                   |
| MolProbity score                                | 2.18                  | 2.29                   | 2.48                   |
| Clashscore (all atom)                           | 16.3                  | 16.4                   | 18.26                  |
| Poor rotamers (%)                               | 0                     | 0.2                    | 0.38                   |
| Ramachandran plot                               |                       |                        |                        |
| Favored (%)                                     | 92.4                  | 93.8                   | 97                     |
| Allowed (%)                                     | 7.5                   | 6.9                    | 2.7                    |
| Disallowed (%)                                  | 0                     | 0.3                    | 0.3                    |
